# Supplementary material for: Adverse Cell Culture Conditions Mimicking the Tumor Microenvironment Upregulate ABCG2 to Mediate Multidrug Resistance and a More Malignant Phenotype
Source: PubMed Central journal article supplement (PMC3384895; doi:10.5402/2012/746025), 2012-06-14

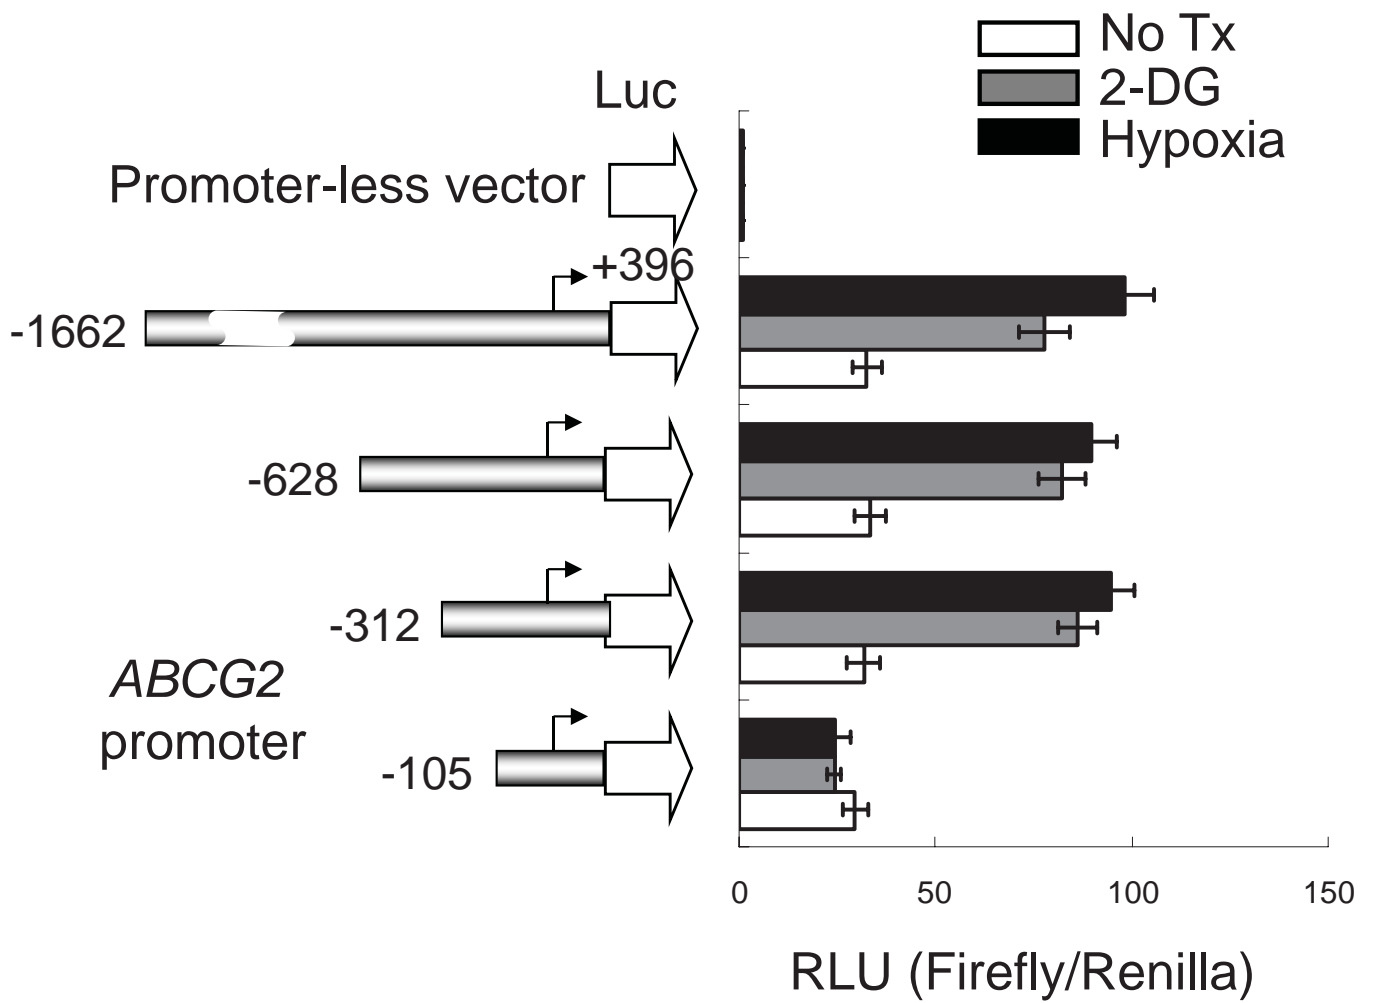

Supplement: 746025.f1.pdf [file 746025.f1.pdf]
